# Supplementary material for: Decreasing Nitrogen Fertilizer Input Had Little Effect on Microbial Communities in Three Types of Soils
Source: PubMed Central journal article supplement (PMC4798769; doi:10.1371/journal.pone.0151622), 2016-03-18
Supplement: pone.0151622.s001.pdf [file pone.0151622.s001.pdf]

| Soil type     | N Treatment | pH   | SOC   | TN   | C/N   | Available N |
|---------------|-------------|------|-------|------|-------|-------------|
| Clay soil     | 0           | 6.10 | 16.41 | 1.39 | 11.81 | 135.10      |
|               | 0           | 6.16 | 19.60 | 1.44 | 13.59 | 146.30      |
|               | 0           | 6.14 | 16.50 | 1.45 | 11.35 | 100.80      |
|               | 168         | 5.91 | 16.47 | 1.46 | 11.26 | 140.70      |
|               | 168         | 5.99 | 16.98 | 1.38 | 12.29 | 126.00      |
|               | 168         | 6.05 | 16.91 | 1.50 | 11.24 | 121.10      |
|               | 240         | 6.04 | 17.10 | 1.41 | 12.09 | 127.40      |
|               | 240         | 5.95 | 16.47 | 1.47 | 11.19 | 130.20      |
|               | 240         | 5.89 | 16.60 | 1.40 | 11.84 | 126.70      |
|               | 270         | 5.83 | 17.05 | 1.37 | 12.41 | 131.60      |
|               | 270         | 5.92 | 16.05 | 1.44 | 11.19 | 135.10      |
|               | 270         | 5.96 | 15.84 | 1.38 | 11.46 | 124.60      |
|               | 312         | 5.86 | 13.63 | 1.46 | 9.32  | 137.20      |
|               | 312         | 5.81 | 13.21 | 1.45 | 9.08  | 135.80      |
|               | 312         | 6.00 | 14.10 | 1.38 | 10.23 | 134.40      |
| Alluvial soil | 0           | 5.88 | 12.08 | 1.20 | 10.08 | 83.30       |
|               | 0           | 5.79 | 12.73 | 1.19 | 10.65 | 88.20       |
|               | 0           | 5.72 | 13.86 | 1.15 | 12.04 | 88.20       |
|               | 168         | 5.59 | 11.25 | 1.16 | 9.71  | 98.00       |
|               | 168         | 5.49 | 10.82 | 1.11 | 9.77  | 93.80       |
|               | 168         | 5.56 | 9.97  | 1.14 | 8.76  | 94.50       |
|               | 240         | 5.68 | 10.83 | 1.11 | 9.77  | 99.40       |
|               | 240         | 5.58 | 12.02 | 1.17 | 10.30 | 102.20      |
|               | 240         | 5.61 | 10.78 | 1.03 | 10.44 | 105.00      |
|               | 270         | 5.66 | 11.97 | 1.23 | 9.75  | 102.90      |
|               | 270         | 5.56 | 12.92 | 1.19 | 10.89 | 101.50      |
|               | 270         | 5.54 | 13.92 | 1.16 | 12.03 | 109.90      |
|               | 312         | 5.53 | 10.54 | 1.16 | 9.05  | 101.50      |
|               | 312         | 5.54 | 11.24 | 1.06 | 10.58 | 98.70       |
|               | 312         | 5.61 | 10.70 | 1.06 | 10.10 | 114.10      |
| Sandy soil    | 0           | 6.09 | 7.37  | 1.16 | 6.35  | 68.60       |
|               | 0           | 6.07 | 7.88  | 1.10 | 7.13  | 49.70       |
|               | 0           | 6.16 | 6.23  | 1.14 | 5.47  | 56.00       |
|               | 168         | 5.68 | 8.20  | 1.08 | 7.61  | 60.20       |
|               | 168         | 5.54 | 7.73  | 1.08 | 7.14  | 53.90       |
|               | 168         | 5.42 | 7.57  | 1.10 | 6.86  | 81.90       |
|               | 240         | 5.31 | 9.73  | 1.10 | 8.83  | 56.70       |
|               | 240         | 5.24 | 8.66  | 1.11 | 7.81  | 70.00       |
|               | 240         | 5.42 | 8.57  | 1.04 | 8.26  | 44.80       |
|               | 270         | 5.15 | 9.88  | 1.15 | 8.58  | 76.30       |
|               | 270         | 5.28 | 9.40  | 1.10 | 8.54  | 56.70       |
|               | 270         | 5.30 | 10.35 | 1.15 | 9.01  | 56.00       |
|               | 312         | 5.17 | 8.03  | 0.91 | 8.80  | 70.70       |
|               | 312         | 5.25 | 9.35  | 1.10 | 8.46  | 51.80       |

|               | 312         | 5.14        | 9.85        | 1.08          | 9.16   | 60.20   |
|---------------|-------------|-------------|-------------|---------------|--------|---------|
| Soil type     | N Treatment | Available P | Available K | Total biomass | Fungi  | Gm+     |
| Clay soil     | 0           | 42.22       | 217.42      | 6225.91       | 137.83 | 1206.19 |
|               | 0           | 34.01       | 186.27      | 5792.26       | 128.26 | 1142.00 |
|               | 0           | 21.05       | 182.25      | 4877.21       | 111.90 | 930.44  |
|               | 168         | 34.55       | 193.30      | 4836.76       | 83.00  | 956.31  |
|               | 168         | 51.81       | 172.21      | 5246.95       | 92.74  | 1029.24 |
|               | 168         | 27.48       | 188.28      | 4745.67       | 80.91  | 924.59  |
|               | 240         | 33.95       | 187.28      | 3650.90       | 69.02  | 715.06  |
|               | 240         | 46.10       | 196.32      | 3973.96       | 70.52  | 768.33  |
|               | 240         | 28.65       | 225.45      | 3813.96       | 66.96  | 756.51  |
|               | 270         | 29.25       | 156.13      | 4408.42       | 81.67  | 873.96  |
|               | 270         | 73.66       | 178.23      | 4616.26       | 83.81  | 921.61  |
|               | 270         | 33.93       | 190.29      | 4324.97       | 83.93  | 839.54  |
|               | 312         | 27.75       | 178.23      | 4481.59       | 78.93  | 905.29  |
|               | 312         | 40.70       | 203.35      | 3717.70       | 64.26  | 737.15  |
|               | 312         | 28.51       | 173.21      | 3743.75       | 73.11  | 751.14  |
| Alluvial soil | 0           | 11.25       | 144.08      | 2881.02       | 63.63  | 562.29  |
|               | 0           | 30.70       | 190.29      | 3274.05       | 68.41  | 624.65  |
|               | 0           | 31.64       | 183.26      | 3348.38       | 70.59  | 621.55  |
|               | 168         | 37.24       | 153.12      | 4666.94       | 78.51  | 881.06  |
|               | 168         | 34.60       | 128.00      | 4367.31       | 64.72  | 836.52  |
|               | 168         | 29.44       | 155.13      | 4380.74       | 73.32  | 844.83  |
|               | 240         | 30.41       | 136.04      | 4690.77       | 69.76  | 878.70  |
|               | 240         | 31.89       | 134.03      | 4477.38       | 71.46  | 892.69  |
|               | 240         | 23.97       | 127.00      | 5114.74       | 71.21  | 915.20  |
|               | 270         | 31.63       | 133.03      | 4205.28       | 62.72  | 829.14  |
|               | 270         | 37.66       | 140.06      | 4725.55       | 68.19  | 942.31  |
|               | 270         | 29.11       | 136.04      | 4697.34       | 68.65  | 921.15  |
|               | 312         | 32.00       | 146.09      | 4125.25       | 62.15  | 831.35  |
|               | 312         | 26.92       | 113.94      | 4682.72       | 68.47  | 926.80  |
|               | 312         | 29.06       | 165.17      | 4152.87       | 70.01  | 815.39  |
| Sandy soil    | 0           | 20.28       | 145.08      | 4566.20       | 106.22 | 912.32  |
|               | 0           | 13.43       | 111.93      | 4656.36       | 103.82 | 917.66  |
|               | 0           | 18.67       | 131.02      | 4517.36       | 101.88 | 919.02  |
|               | 168         | 11.83       | 101.88      | 3731.43       | 66.43  | 700.70  |
|               | 168         | 20.47       | 131.02      | 3252.96       | 61.87  | 591.78  |
|               | 168         | 14.22       | 112.93      | 3159.71       | 61.72  | 593.30  |
|               | 240         | 17.35       | 138.05      | 3076.49       | 50.61  | 546.17  |
|               | 240         | 21.82       | 98.87       | 3658.46       | 67.30  | 641.18  |
|               | 240         | 10.85       | 95.86       | 3300.49       | 53.23  | 601.74  |
|               | 270         | 18.49       | 139.05      | 3595.67       | 59.96  | 643.31  |
|               | 270         | 21.08       | 156.13      | 3376.44       | 55.92  | 635.24  |
|               | 270         | 12.42       | 136.04      | 3532.27       | 64.70  | 650.57  |

|     |       |        |         |       |        |
|-----|-------|--------|---------|-------|--------|
| 312 | 18.92 | 93.85  | 4328.66 | 93.66 | 796.86 |
| 312 | 11.83 | 140.06 | 4185.59 | 86.63 | 751.00 |
| 312 | 13.59 | 91.84  | 3985.10 | 79.35 | 744.49 |

| Soil type  | N Treatment   | Gm-     | Bacteria | Actinomycetes | F/B    | Gm+/Gm- |
|------------|---------------|---------|----------|---------------|--------|---------|
| Clay soil  | 0             | 1366.98 | 2573.17  | 757.40        | 0.05   | 0.88    |
|            | 0             | 1279.23 | 2421.23  | 698.27        | 0.05   | 0.89    |
|            | 0             | 1049.60 | 1980.05  | 579.20        | 0.06   | 0.89    |
|            | 168           | 990.72  | 1947.03  | 548.80        | 0.04   | 0.97    |
|            | 168           | 1109.34 | 2138.58  | 609.03        | 0.04   | 0.93    |
|            | 168           | 971.60  | 1896.19  | 551.58        | 0.04   | 0.95    |
|            | 240           | 795.74  | 1510.80  | 433.35        | 0.05   | 0.90    |
|            | 240           | 869.42  | 1637.75  | 450.00        | 0.04   | 0.88    |
|            | 240           | 831.51  | 1588.02  | 414.79        | 0.04   | 0.91    |
|            | 270           | 893.71  | 1767.67  | 484.29        | 0.05   | 0.98    |
|            | 270           | 959.13  | 1880.73  | 512.63        | 0.04   | 0.96    |
|            | 270           | 870.68  | 1710.22  | 503.92        | 0.05   | 0.96    |
|            | 312           | 933.92  | 1839.21  | 483.80        | 0.04   | 0.97    |
|            | 312           | 726.51  | 1463.67  | 425.26        | 0.04   | 1.01    |
|            | Alluvial soil | 0       | 784.93   | 1536.07       | 421.22 | 0.05    |
| 0          |               | 532.25  | 1094.54  | 289.67        | 0.06   | 1.06    |
| 0          |               | 580.30  | 1204.95  | 342.09        | 0.06   | 1.08    |
| 0          |               | 587.75  | 1209.30  | 320.69        | 0.06   | 1.06    |
| 168        |               | 848.78  | 1729.84  | 392.51        | 0.05   | 1.04    |
| 168        |               | 742.33  | 1578.85  | 434.00        | 0.04   | 1.13    |
| 168        |               | 778.36  | 1623.19  | 445.57        | 0.05   | 1.09    |
| 240        |               | 774.72  | 1653.43  | 481.12        | 0.04   | 1.13    |
| 240        |               | 748.17  | 1640.86  | 468.64        | 0.04   | 1.19    |
| 240        |               | 795.42  | 1710.63  | 478.66        | 0.04   | 1.15    |
| 270        |               | 748.91  | 1578.05  | 387.52        | 0.04   | 1.11    |
| 270        |               | 826.20  | 1768.51  | 447.28        | 0.04   | 1.14    |
| 270        |               | 789.14  | 1710.28  | 446.33        | 0.04   | 1.17    |
| 312        |               | 724.97  | 1556.31  | 411.15        | 0.04   | 1.15    |
| Sandy soil |               | 312     | 839.85   | 1766.65       | 465.31 | 0.04    |
|            | 312           | 751.63  | 1567.02  | 402.96        | 0.04   | 1.08    |
|            | 0             | 932.87  | 1845.19  | 437.39        | 0.06   | 0.98    |
|            | 0             | 923.62  | 1841.28  | 413.32        | 0.06   | 0.99    |
|            | 0             | 921.71  | 1840.73  | 432.40        | 0.06   | 1.00    |
|            | 168           | 623.68  | 1324.37  | 360.63        | 0.05   | 1.12    |
|            | 168           | 553.74  | 1145.52  | 284.14        | 0.05   | 1.07    |
|            | 168           | 526.42  | 1119.72  | 276.46        | 0.06   | 1.13    |
|            | 240           | 544.40  | 1090.57  | 293.96        | 0.05   | 1.00    |
|            | 240           | 658.64  | 1299.82  | 356.21        | 0.05   | 0.97    |
|            | 240           | 578.49  | 1180.22  | 320.16        | 0.05   | 1.04    |
|            | 270           | 677.77  | 1321.08  | 363.86        | 0.05   | 0.95    |

|     |        |         |        |      |      |
|-----|--------|---------|--------|------|------|
| 270 | 627.48 | 1262.72 | 294.18 | 0.04 | 1.01 |
| 270 | 618.56 | 1269.13 | 319.67 | 0.05 | 1.05 |
| 312 | 819.48 | 1616.33 | 409.66 | 0.06 | 0.97 |
| 312 | 760.70 | 1511.70 | 365.30 | 0.06 | 0.99 |
| 312 | 647.52 | 1392.01 | 328.83 | 0.06 | 1.15 |
